# Supplementary material for: Açaì (Euterpe oleracea) Extract Protects Human Erythrocytes from Age-Related Oxidative Stress
Source: MDPI journal article supplement (doi:10.3390/cells11152391), 2022-08-03
Supplement: s1 [file s1]

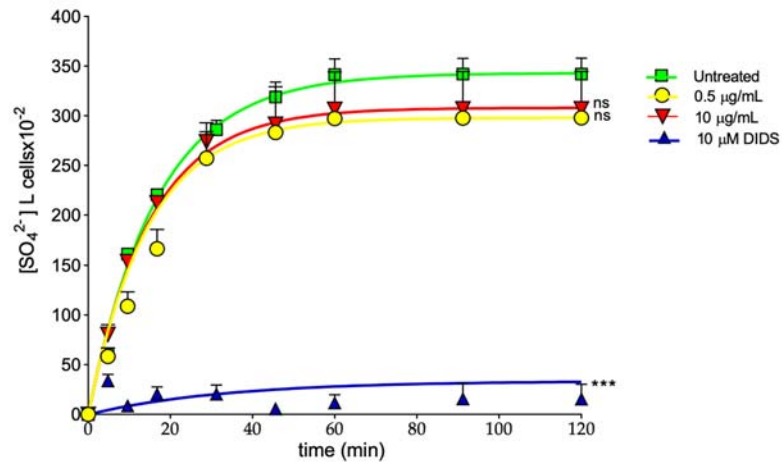

**Figure S1.** Time course of  $\text{SO}_4^{2-}$  uptake in erythrocytes left untreated (control) or treated with increasing concentrations (0.5 and 10  $\mu\text{g/mL}$ ) of freeze-dried Açai extract (pre-incubation for 1 hour), or 10  $\mu\text{M}$  DIDS. ns, not statistically significant versus control; \*\*\*,  $p < 0.001$  versus control, one way ANOVA followed by Bonferroni's post hoc test.
